# Supplementary material
Source: PubMed Central journal article supplement (PMC3252832)

# Supplementary Figure 1

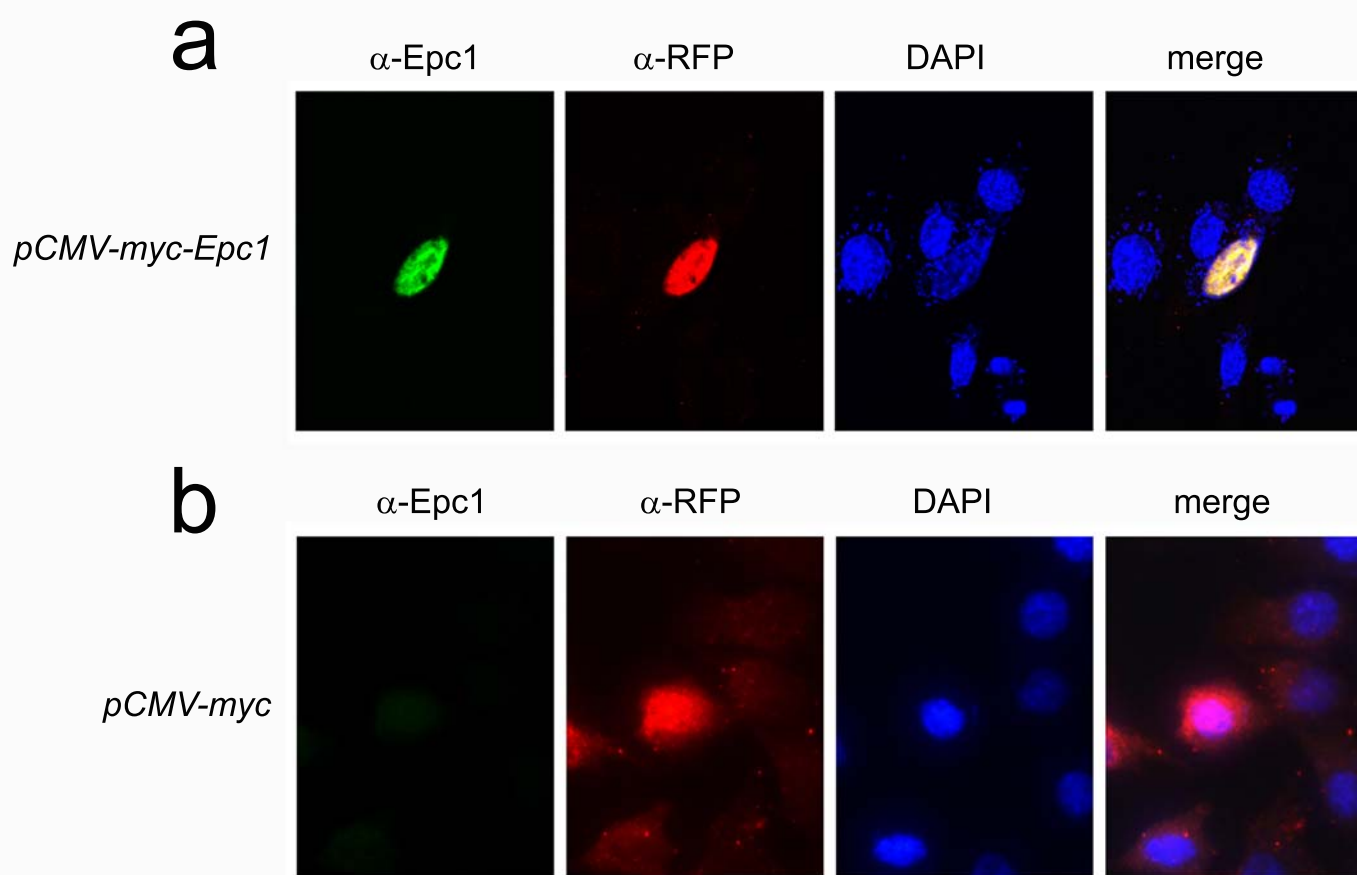

Supplement: cdd201172x1.pdf [file cdd201172x1.pdf]

# Supplementary Figure 2

**a**

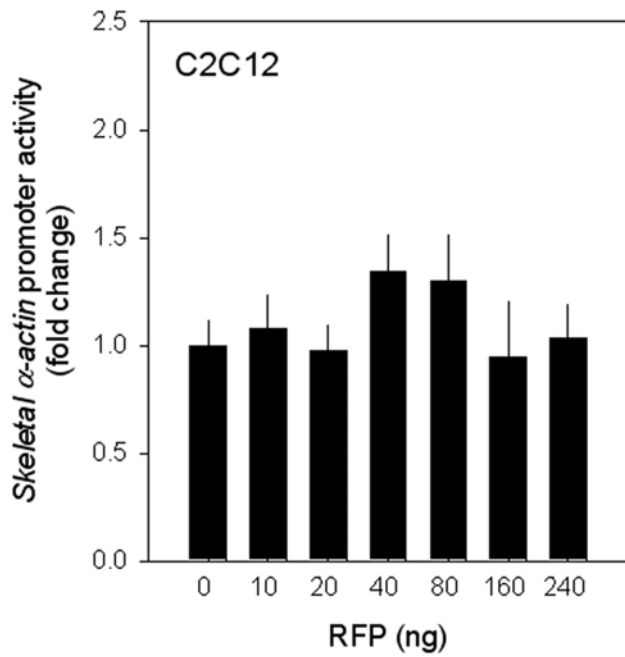

**b**

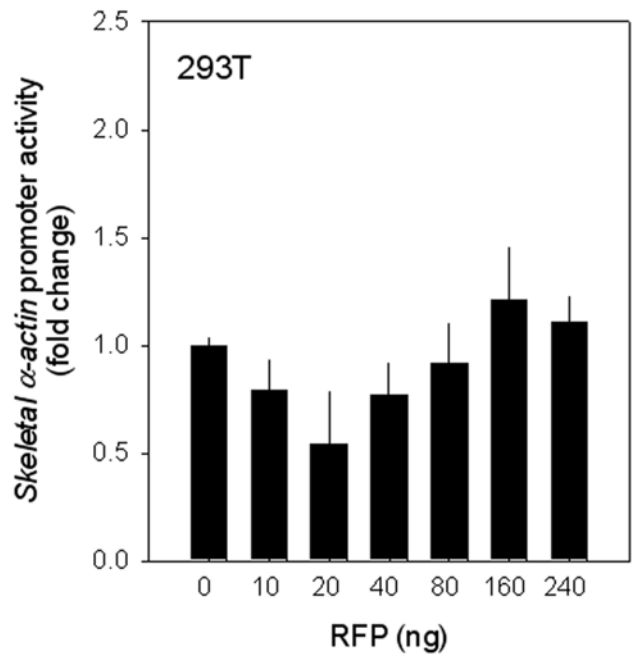

**c**

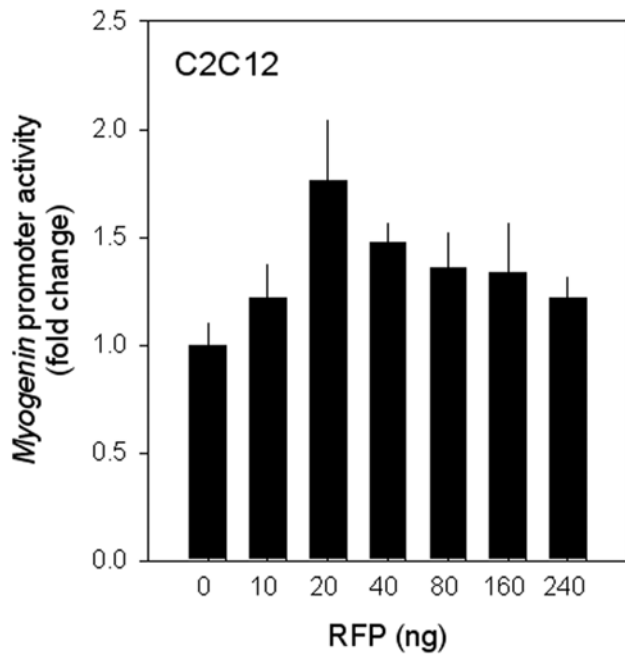

**d**

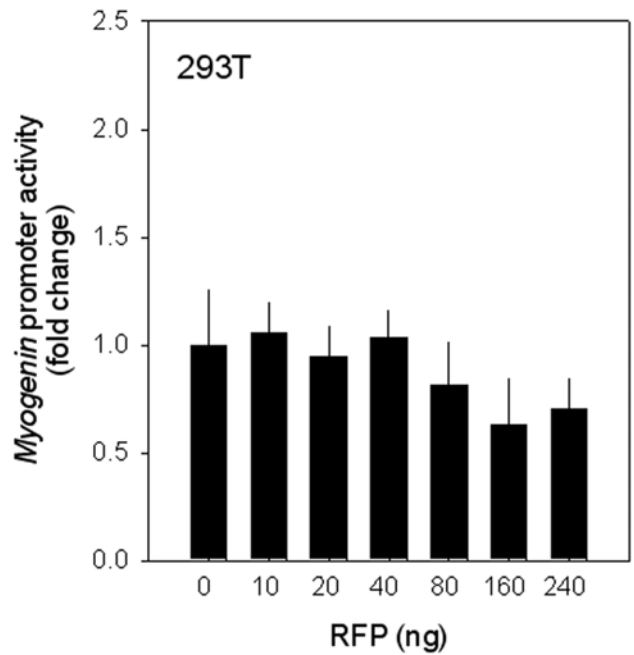

Supplement: cdd201172x2.pdf [file cdd201172x2.pdf]

# Supplementary Figure 3

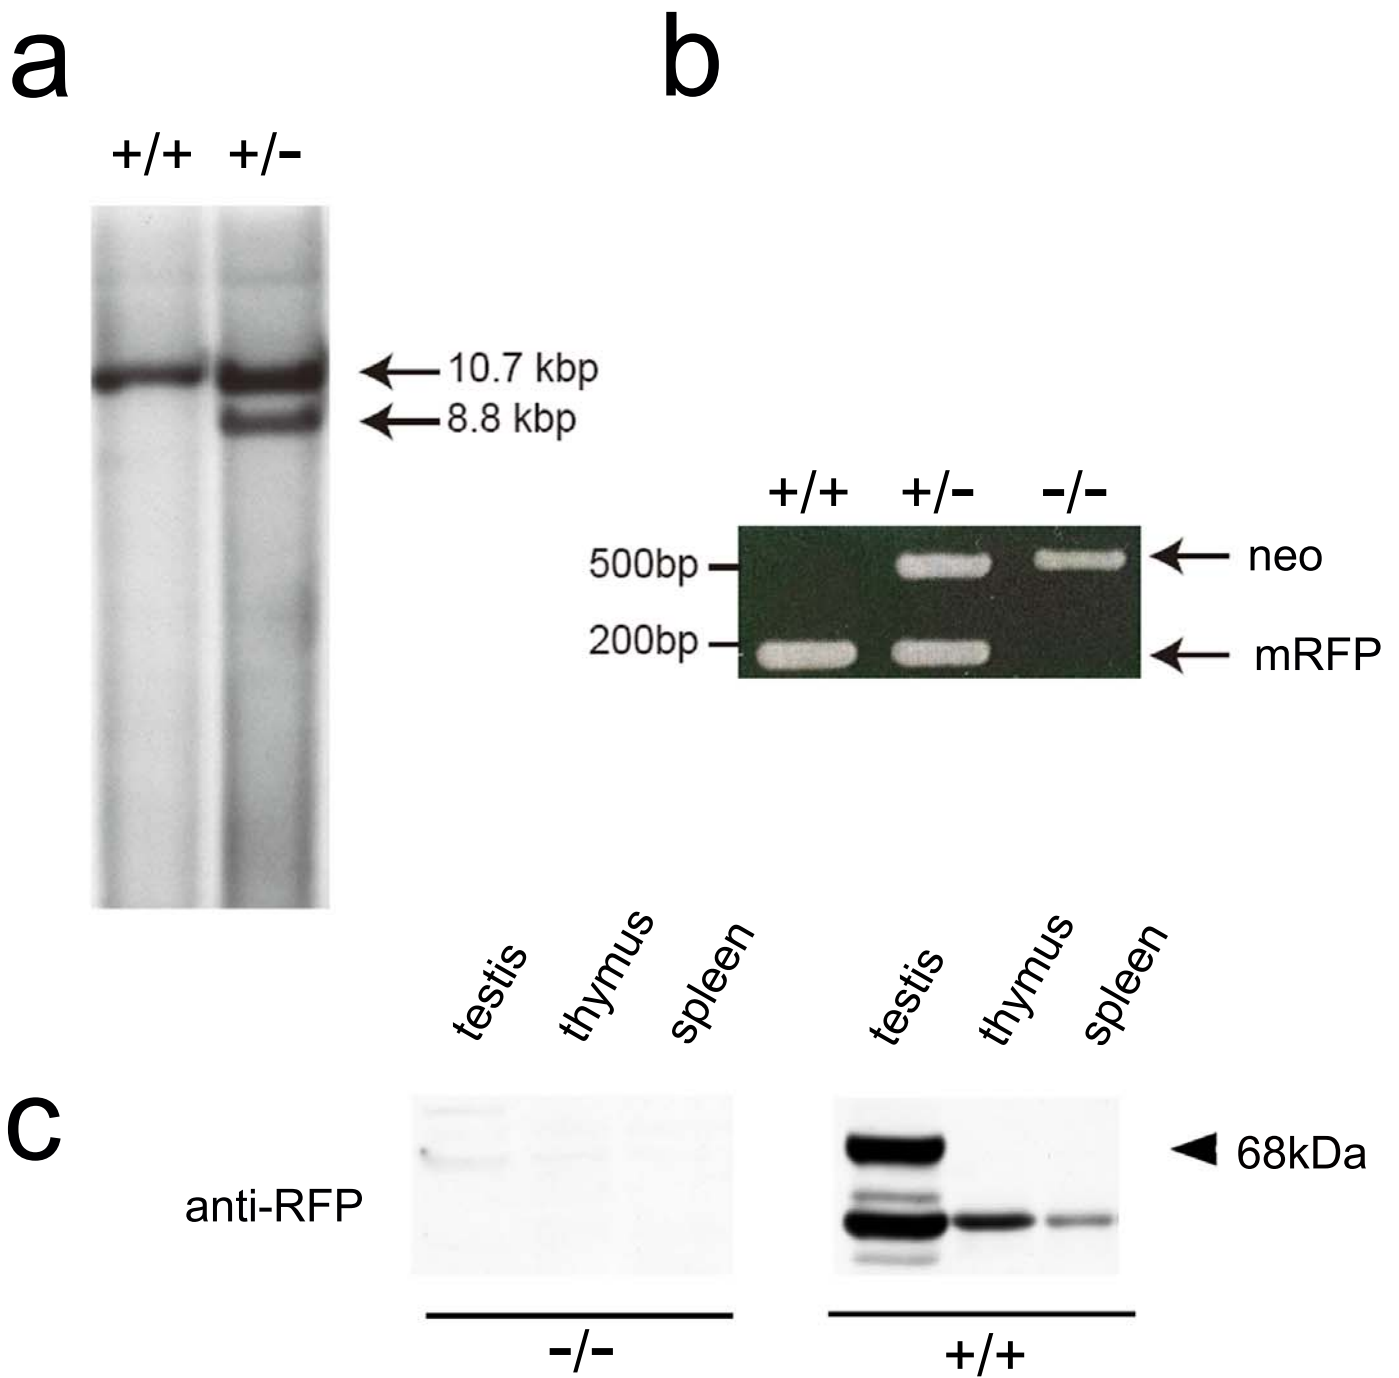

Supplement: cdd201172x3.pdf [file cdd201172x3.pdf]

## Supplementary Figure 4

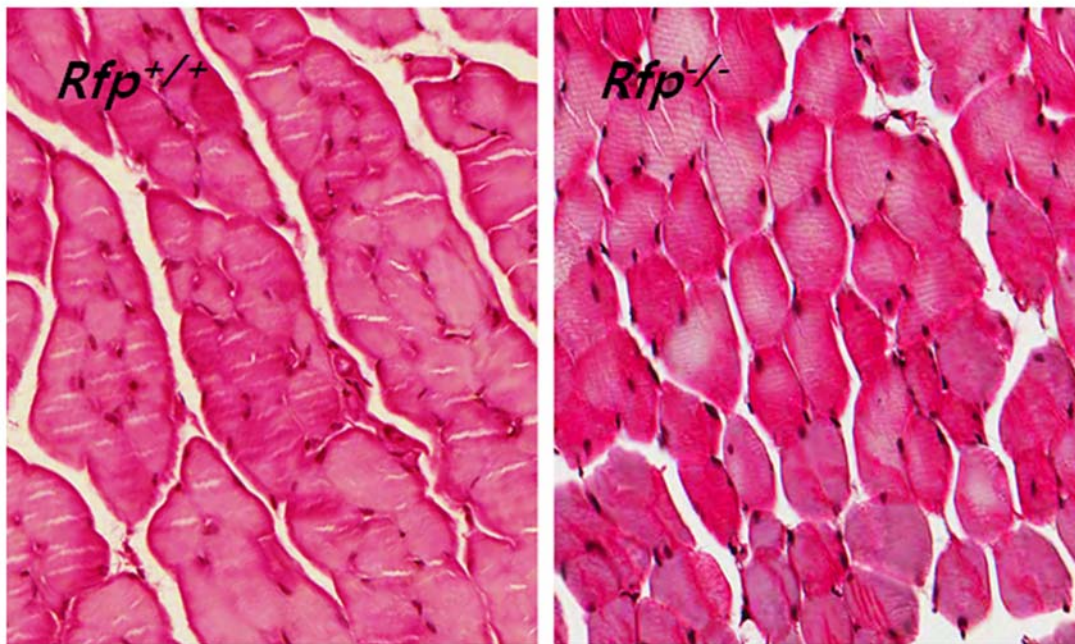

Supplement: cdd201172x4.pdf [file cdd201172x4.pdf]
